# Supplementary material for: Genomic Islands Identified in Highly Resistant Serratia sp. HRI: A Pathway to Discover New Disinfectant Resistance Elements
Source: MDPI journal article supplement (doi:10.3390/microorganisms11020515), 2023-02-17
Supplement: s1 [file s1]

## Supplementary Materials

**Table S1.** Gene lists of genomic island 18 of *Serratia* sp. HRI (1 655 571bp - 1 660 471bp, GC content 62.3, Size 4 900 bp) identified by IslandViewer4 and annotated by RAST

|   | Function                                                    | Start | Stop | Length (bp) |
|---|-------------------------------------------------------------|-------|------|-------------|
| 1 | <b>ABC-type efflux pump permease component YbhS</b>         | 3     | 1154 | 1152        |
| 2 | <b>ABC-type efflux pump permease component YbhR</b>         | 1167  | 2273 | 1107        |
| 3 | Inner membrane protein YbhL                                 | 3059  | 2349 | 711         |
| 4 | Molybdopterin synthase catalytic subunit MoaE (EC 2.8.1.12) | 3657  | 3190 | 468         |
| 5 | Molybdopterin synthase sulfur carrier subunit               | 3905  | 3660 | 246         |
| 6 | Cyclic pyranopterins monophosphate synthase (EC 4.6.1.17)   | 4381  | 3902 | 480         |
| 7 | Molybdenum cofactor biosynthesis protein MoaB               | 4900  | 4385 | 516         |

Genomic island 18 contains 2 confirmed ABC-type efflux pump permease components YbhS and YbhR, as well as an inner membrane protein YbhL.

**Table S2.** Gene lists of genomic island 23 of *Serratia* sp. HRI (1 875 362 bp -1 879 853bp, GC content: 45.1, Size 4 491 bp) identified by IslandViewer4 and annotated by RAST

|   | Function                                                             | Start | Stop | Length (bp) |
|---|----------------------------------------------------------------------|-------|------|-------------|
| 1 | <b>Permease of the drug/metabolite transporter (DMT) superfamily</b> | 1256  | 3    | 1254        |
| 2 | hypothetical protein                                                 | 2715  | 1249 | 1467        |
| 3 | Glycosyl transferase, group 2 family protein                         | 3562  | 2708 | 855         |
| 4 | dTDP-rhamnosyl transferase RfbF (EC 2.-.-)                           | 4491  | 3559 | 933         |

Genomic island 23 is one of the smallest islands identified and contains a permease of the drug/metabolite transporter (DMT) superfamily.

**Table S3.** Gene lists of genomic island 28 of *Serratia* sp. HRI (2 294 061bp - 2 309 315bp, GC content: 48.1, Size: 15 254 bp) identified by IslandViewer4 and additional annotated by RAST

|   | Function                                                                | Start | Stop | Length (bp) |
|---|-------------------------------------------------------------------------|-------|------|-------------|
| 1 | Similar to citrate lyase beta chain, 3                                  | 869   | 3    | 867         |
| 2 | Siderophore synthetase superfamily, group B                             | 1041  | 2900 | 1860        |
| 3 | Ferrichrome-iron receptor                                               | 2929  | 5040 | 2112        |
| 4 | Orn/DAP/Arg family decarboxylase                                        | 5052  | 6452 | 1401        |
| 5 | Pyridoxal-5'-phosphate-dependent enzyme beta superfamily (fold type II) | 6464  | 7477 | 1014        |

|    |                                                                                 |             |              |             |
|----|---------------------------------------------------------------------------------|-------------|--------------|-------------|
| 6  | Tauropine dehydrogenase                                                         | 7477        | 8634         | 1158        |
| 7  | <b>Multidrug resistance protein ErmB</b>                                        | <b>8637</b> | <b>9863</b>  | <b>1227</b> |
| 8  | <b>ABC transporter, substrate-binding protein (cluster 8, B12/iron complex)</b> | <b>9860</b> | <b>11020</b> | <b>1161</b> |
| 9  | probable class-V aminotransferase                                               | 10989       | 12173        | 1185        |
| 10 | hypothetical protein                                                            | 12181       | 12597        | 417         |
| 11 | Transposase InsN for insertion sequence element IS911                           | 13027       | 13272        | 246         |
| 12 | Transposase InsO for insertion sequence element IS911                           | 13458       | 13856        | 399         |
| 13 | Transposase                                                                     | 14178       | 15254        | 1077        |

Genomic island 28 contains the multidrug resistance protein ErmB conferring resistance to macrolide and erythromycin antibiotics, as well as an ABC transporter, substrate-binding protein. There are also multiple transposase genes within this genomic island and multiple iron-associated genes.

**Table S4.** Gene lists of genomic island 33 of *Serratia* sp. HRI (2 548 843bp – 2 553 244bp, GC content 41.9, Size: 4 401 bp) identified by IslandViewer4 and annotated by RAST

|   | Function             | Start      | Stop        | Length (bp) |
|---|----------------------|------------|-------------|-------------|
| 1 | hypothetical protein | 3          | 200         | 198         |
| 2 | <b>Protease HtpX</b> | <b>278</b> | <b>1156</b> | <b>879</b>  |
| 3 | hypothetical protein | 1551       | 1667        | 117         |
| 4 | hypothetical protein | 1683       | 1856        | 174         |
| 5 | hypothetical protein | 2030       | 3229        | 1200        |
| 6 | hypothetical protein | 3232       | 4401        | 1170        |

**Table S5.** Gene lists of genomic island 42 of *Serratia* sp. HRI (3 188 478bp – 3 232 330bp, GC content: 51.2, Size: 43 852 bp) identified by IslandViewer4 and annotated by RAST

|    | Function                                            | Start | Stop | Length (bp) |
|----|-----------------------------------------------------|-------|------|-------------|
| 1  | Mobile element protein                              | 3     | 464  | 462         |
| 2  | Resolvase/integrase                                 | 1028  | 471  | 558         |
| 3  | hypothetical protein                                | 1393  | 1022 | 372         |
| 4  | hypothetical protein                                | 2697  | 1390 | 1308        |
| 5  | Mobile element protein                              | 2696  | 4189 | 1494        |
| 6  | Mobile element protein                              | 4197  | 4319 | 123         |
| 7  | Transposase                                         | 4357  | 5055 | 699         |
| 8  | hypothetical protein                                | 5602  | 5474 | 129         |
| 9  | Toxin HigB                                          | 6101  | 6430 | 330         |
| 10 | Antitoxin HigA                                      | 6411  | 6692 | 282         |
| 11 | hypothetical protein                                | 6968  | 6807 | 162         |
| 12 | repeat region                                       | 6898  | 8102 | 1205        |
| 13 | Transposase InsH for insertion sequence element IS5 | 6970  | 7950 | 981         |
| 14 | hypothetical protein                                | 8114  | 7989 | 126         |
| 15 | Bacterial non-heme ferritin (EC 1.16.3.2)           | 8767  | 8267 | 501         |
| 16 | Mobile element protein                              | 9744  | 9022 | 723         |

|    |                                                                                                                                       |              |              |             |
|----|---------------------------------------------------------------------------------------------------------------------------------------|--------------|--------------|-------------|
| 17 | Transposase InsH for insertion sequence element IS5                                                                                   | 9785         | 10438        | 654         |
| 18 | hypothetical protein                                                                                                                  | 10894        | 11025        | 132         |
| 19 | hypothetical protein                                                                                                                  | 11060        | 11317        | 258         |
| 20 | Mobile element protein                                                                                                                | 12199        | 11990        | 210         |
| 21 | Mobile element protein                                                                                                                | 12957        | 12376        | 582         |
| 22 | hypothetical protein                                                                                                                  | 13163        | 13288        | 126         |
| 23 | GGDEF domain protein                                                                                                                  | 13485        | 13315        | 171         |
| 24 | repeat region                                                                                                                         | 13447        | 14651        | 1205        |
| 25 | Transposase InsH for insertion sequence element IS5                                                                                   | 14615        | 13599        | 1017        |
| 26 | <b>Copper resistance protein CopC</b>                                                                                                 | <b>15319</b> | <b>14939</b> | <b>381</b>  |
| 27 | <b>Copper resistance protein B</b>                                                                                                    | <b>16249</b> | <b>15359</b> | <b>891</b>  |
| 28 | <b>Multicopper oxidase</b>                                                                                                            | <b>18072</b> | <b>16255</b> | <b>1818</b> |
| 29 | <b>Copper-binding protein PcoE</b>                                                                                                    | <b>18306</b> | <b>18755</b> | <b>450</b>  |
| 30 | Cell wall endopeptidase, family M23/M37                                                                                               | 19044        | 19781        | 738         |
| 31 | hypothetical protein                                                                                                                  | 20012        | 19815        | 198         |
| 32 | <b>Lead, cadmium, zinc and mercury transporting ATPase (EC 3.6.3.3) (EC 3.6.3.5); Copper-translocating P-type ATPase (EC 3.6.3.4)</b> | <b>22041</b> | <b>20053</b> | <b>1989</b> |
| 33 | hypothetical protein                                                                                                                  | 22045        | 22446        | 402         |
| 34 | <b>CopG protein</b>                                                                                                                   | <b>23067</b> | <b>22627</b> | <b>441</b>  |
| 35 | <b>Copper/silver efflux RND transporter, transmembrane protein CusA</b>                                                               | <b>26300</b> | <b>23154</b> | <b>3147</b> |
| 36 | <b>Copper/silver efflux RND transporter, membrane fusion protein CusB</b>                                                             | <b>27603</b> | <b>26311</b> | <b>1293</b> |
| 37 | <b>Copper/silver efflux RND transporter, periplasmic protein CusF</b>                                                                 | <b>28070</b> | <b>27717</b> | <b>354</b>  |
| 38 | <b>Copper/silver efflux RND transporter, outer membrane protein CusC</b>                                                              | <b>29484</b> | <b>28099</b> | <b>1386</b> |
| 39 | <b>Copper-sensing two-component system response regulator CusR</b>                                                                    | <b>29671</b> | <b>30354</b> | <b>684</b>  |
| 40 | <b>Copper sensory histidine kinase CusS</b>                                                                                           | <b>30347</b> | <b>31822</b> | <b>1476</b> |
| 41 | <b>Silver-binding protein silE precursor</b>                                                                                          | <b>31956</b> | <b>32504</b> | <b>549</b>  |
| 42 | hypothetical protein                                                                                                                  | 32652        | 33002        | 351         |
| 43 | hypothetical protein                                                                                                                  | 33187        | 33062        | 126         |
| 44 | Hnh endonuclease                                                                                                                      | 34150        | 33188        | 963         |
| 45 | hypothetical protein                                                                                                                  | 34283        | 34429        | 147         |
| 46 | hypothetical protein                                                                                                                  | 34568        | 34446        | 123         |
| 47 | FIG116849: hypothetical protein                                                                                                       | 35662        | 34640        | 1023        |
| 48 | FIG131328: Predicted ATP-dependent endonuclease of the OLD family                                                                     | 37209        | 35647        | 1563        |
| 49 | VapC toxin protein                                                                                                                    | 37420        | 37283        | 138         |
| 50 | VapC toxin protein                                                                                                                    | 37697        | 37434        | 264         |
| 51 | VapB protein (antitoxin to VapC)                                                                                                      | 37924        | 37694        | 231         |
| 52 | hypothetical protein                                                                                                                  | 38463        | 38233        | 231         |
| 53 | CcdA protein (antitoxin to CcdB)                                                                                                      | 38512        | 38730        | 219         |
| 54 | CcdB toxin protein                                                                                                                    | 38732        | 39037        | 306         |

|    |                        |       |       |      |
|----|------------------------|-------|-------|------|
| 55 | hypothetical protein   | 39095 | 39406 | 312  |
| 56 | hypothetical protein   | 39456 | 39791 | 336  |
| 57 | hypothetical protein   | 39825 | 40841 | 1017 |
| 58 | hypothetical protein   | 40885 | 41046 | 162  |
| 59 | Resolvase              | 41093 | 41818 | 726  |
| 60 | hypothetical protein   | 41834 | 41962 | 129  |
| 61 | hypothetical protein   | 41984 | 42280 | 297  |
| 62 | hypothetical protein   | 42904 | 42770 | 135  |
| 63 | Mobile element protein | 42929 | 43852 | 924  |

Genomic island 42 is one of the larger genomic islands identified consisting of 63 coding sequences. This island contains 13 genes involved in metal response as well as three complete toxin-antitoxin systems including a HigA/HigB system. Mobile genetic elements may have integrated into this genomic island suggested by the presence of multiple mobile element proteins and the presence of transposase, resolvase and integrase genes.

**Table S6.** Gene lists of genomic island 46 of *Serratia* sp. HRI (3 571 957bp – 3 586 537bp, GC content: 51.7, Size: 14 580) identified by IslandViewer4 and annotated by RAST

|    | Function                                           | Start       | Stop        | Length (bp) |
|----|----------------------------------------------------|-------------|-------------|-------------|
| 1  | Polyketide synthase modules and related proteins   | 6866        | 3           | 6864        |
| 2  | Long-chain-fatty-acid--CoA ligase (EC 6.2.1.3)     | 7130        | 7035        | 96          |
| 3  | putative exported protein                          | 7319        | 7152        | 168         |
| 4  | <b>Bicyclomycin resistance protein</b>             | <b>8599</b> | <b>7418</b> | <b>1182</b> |
| 5  | hypothetical protein                               | 10248       | 8905        | 1344        |
| 6  | hypothetical protein                               | 10389       | 10835       | 447         |
| 7  | hypothetical protein                               | 10832       | 11392       | 561         |
| 8  | hypothetical protein                               | 12778       | 11603       | 1176        |
| 9  | transposase, putative                              | 13451       | 12960       | 492         |
| 10 | Error-prone, lesion bypass DNA polymerase V (UmuC) | 13978       | 13628       | 351         |
| 11 | Error-prone repair protein UmuD                    | 14400       | 13993       | 408         |
| 12 | hypothetical protein                               | 14580       | 14425       | 156         |

Genomic island 46 contains a bicyclomycin resistance protein, representing an antibiotic resistance island.
